# Supplementary material for: Association between foot thermal responses and shear forces during turning gait in young adults
Source: PeerJ journal article supplement (doi:10.7717/peerj.10515), 2021-01-18

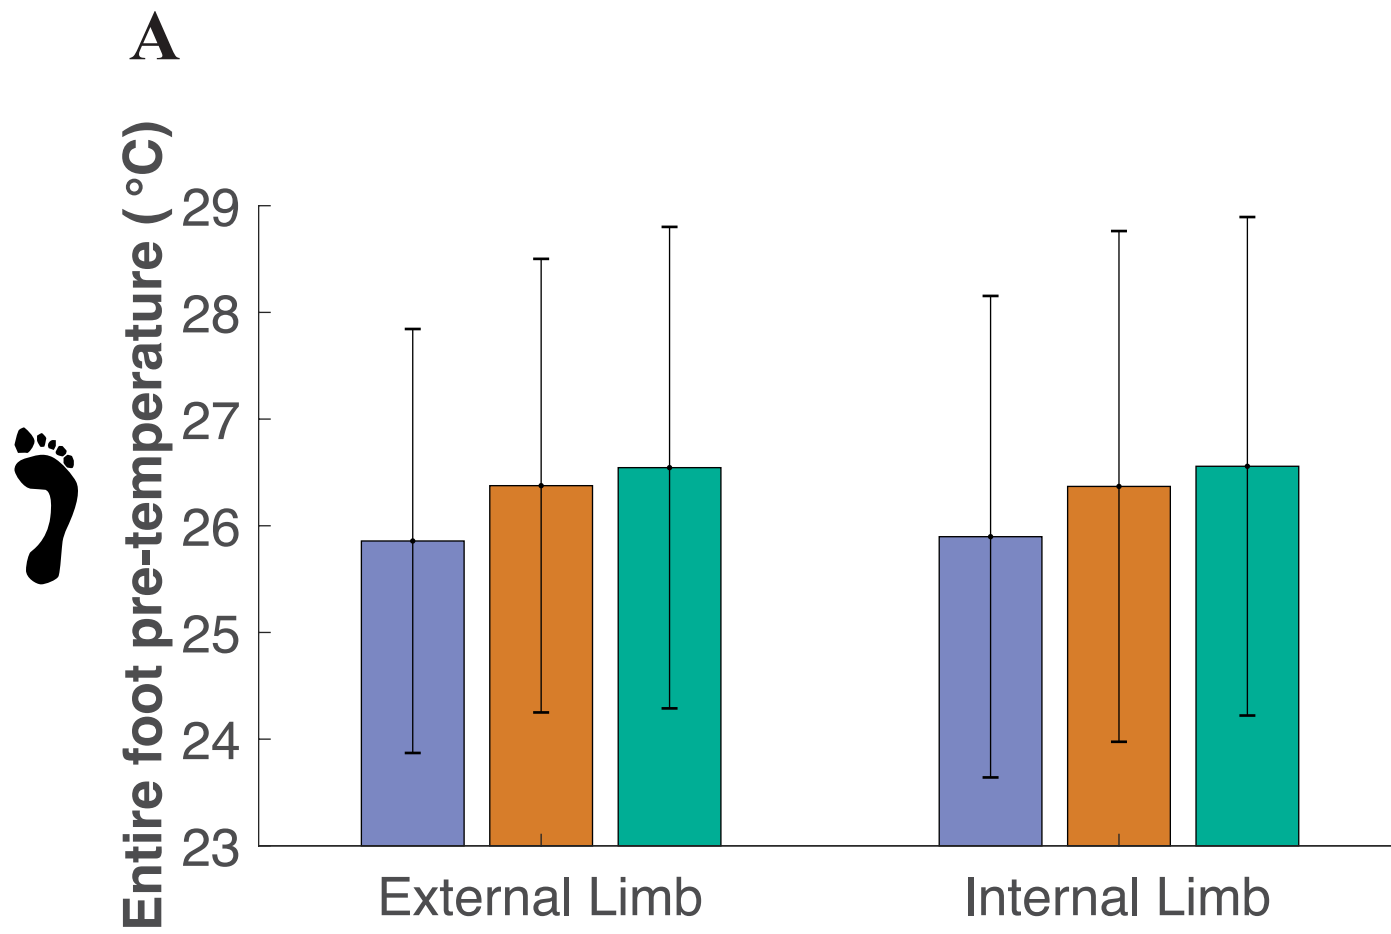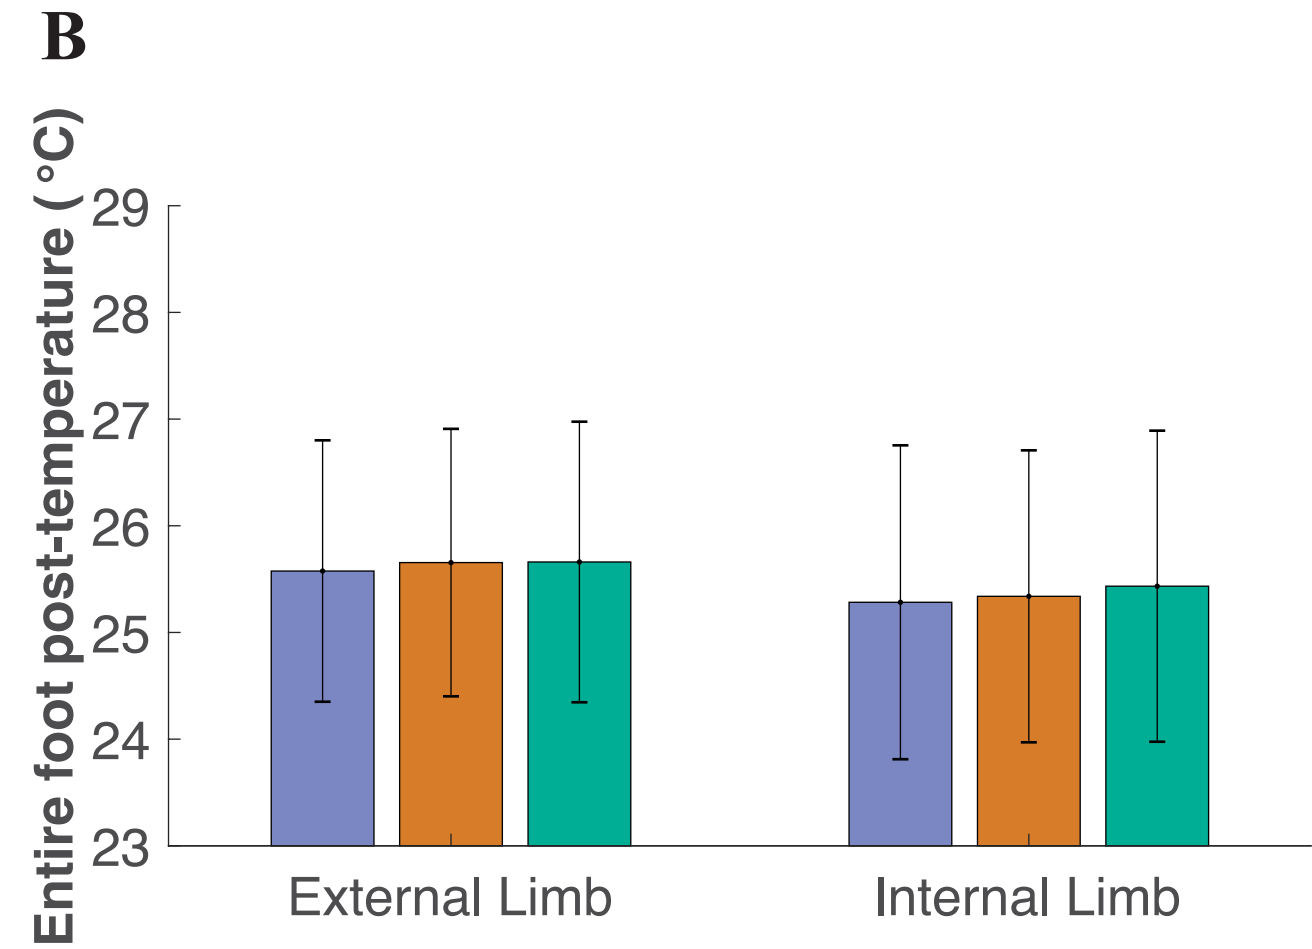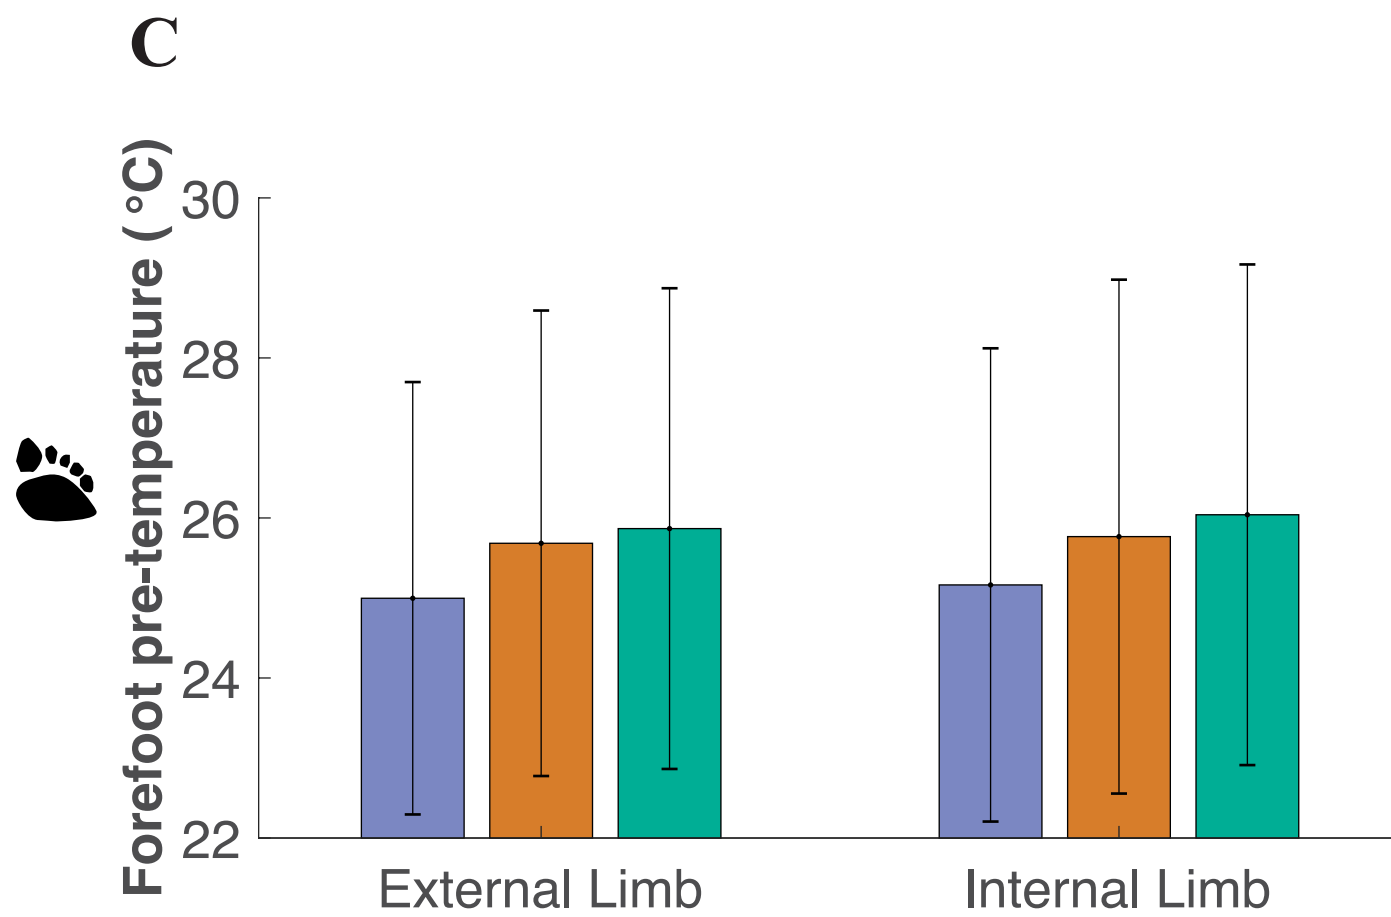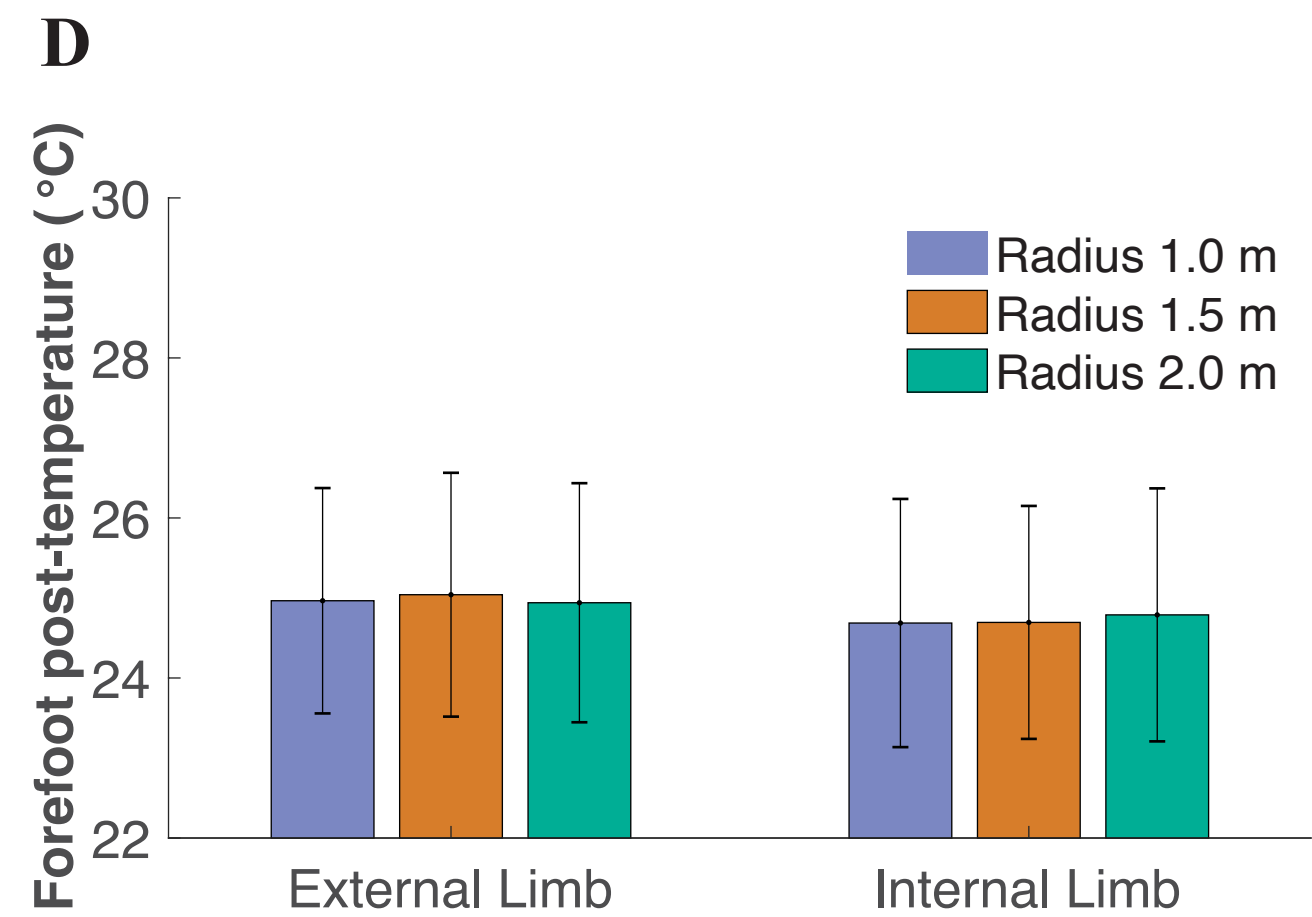

Supplement: FigS2.pdf [file FigS2.pdf]
